# Supplementary material
Source: PubMed Central journal article supplement (PMC8424982)
Supplement: 12941_2021_468_MOESM1_ESM.pdf [file 12941_2021_468_MOESM1_ESM.pdf]

## Supplementary Information

### Antimicrobial susceptibility patterns of respiratory Gram-negative bacterial isolates from COVID-19 patients in Switzerland

Marina Gysin<sup>a\*</sup>, Claudio Tirso Acevedo<sup>b\*</sup>, Klara Haldimann<sup>a\*</sup>, Elias Bodendoerfer<sup>a</sup>, Frank Imkamp<sup>a</sup>, Karl Bulut<sup>a</sup>, Philipp Karl Buehler<sup>c</sup>, Silvio Daniel Brugger<sup>b</sup>, Katja Becker<sup>a</sup>, Sven N. Hobbie<sup>a\*\*</sup>

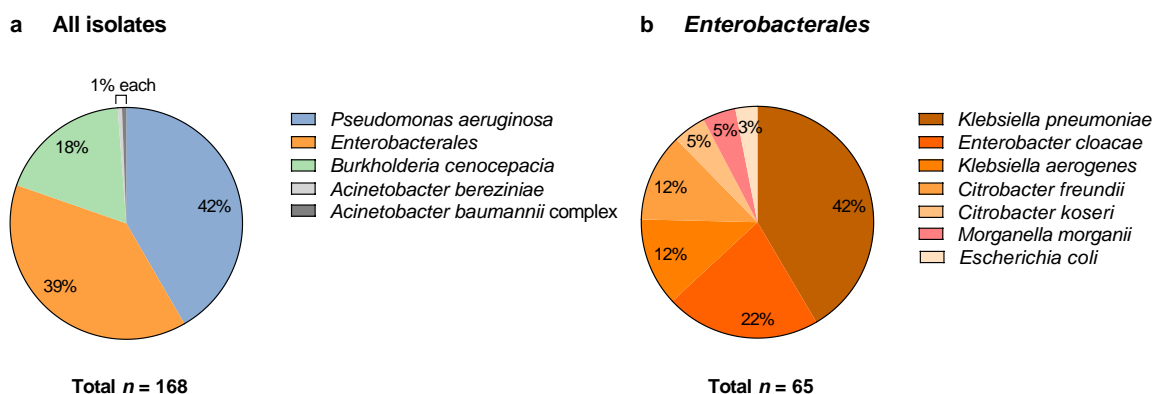

Figure S1. MicrobiotaCOVID cohort species distribution of all identified Gram-negative isolates (a) and within *Enterobacterales* (b).

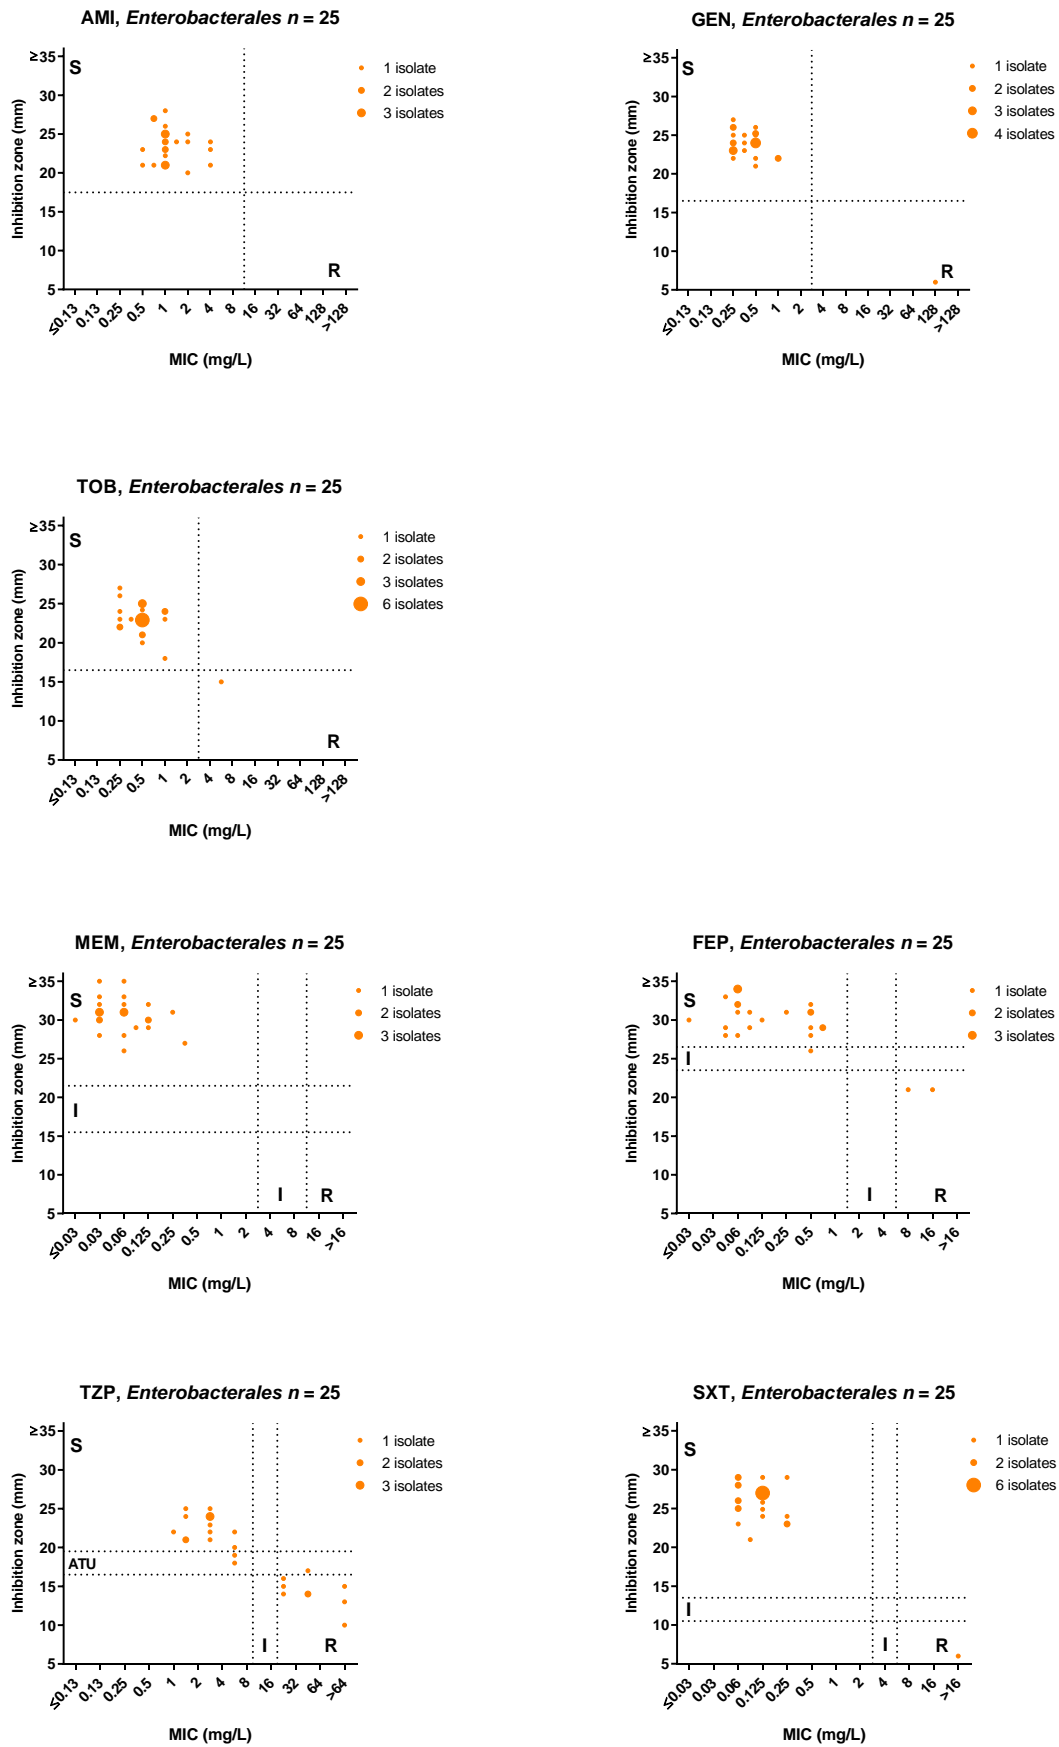

**Figure S2. Correlation plots of EUCAST disc diffusion and CLSI broth microdilution testing for *Enterobacteriales*.** Amikacin (AMI), gentamicin (GEN), tobramycin (TOB), meropenem (MEM), cefepime (FEP), piperacillin/tazobactam (TZP) and trimethoprim/sulfamethoxazole (SXT).

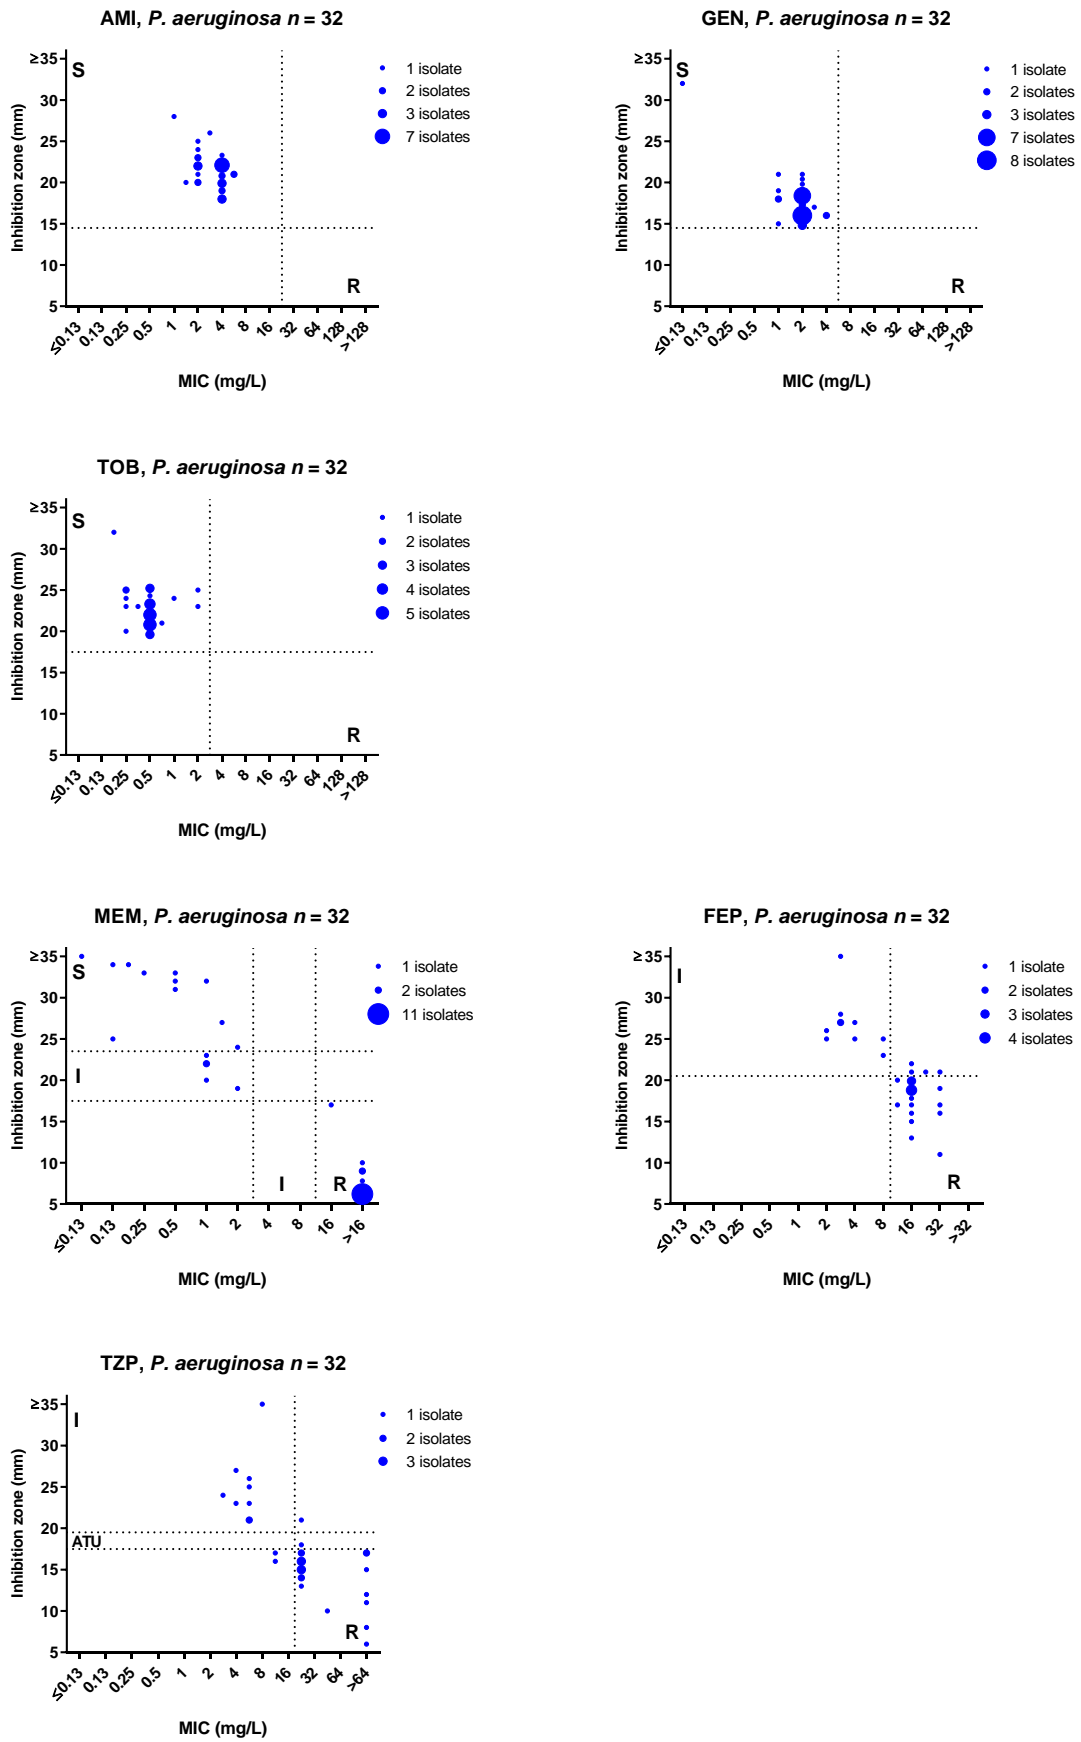

Figure S3. Correlation plots of EUCAST disc diffusion and CLSI broth microdilution testing for *P. aeruginosa*. Amikacin (AMI), gentamicin (GEN), tobramycin (TOB), meropenem (MEM), cefepime (FEP) and piperacillin/tazobactam (TZP).

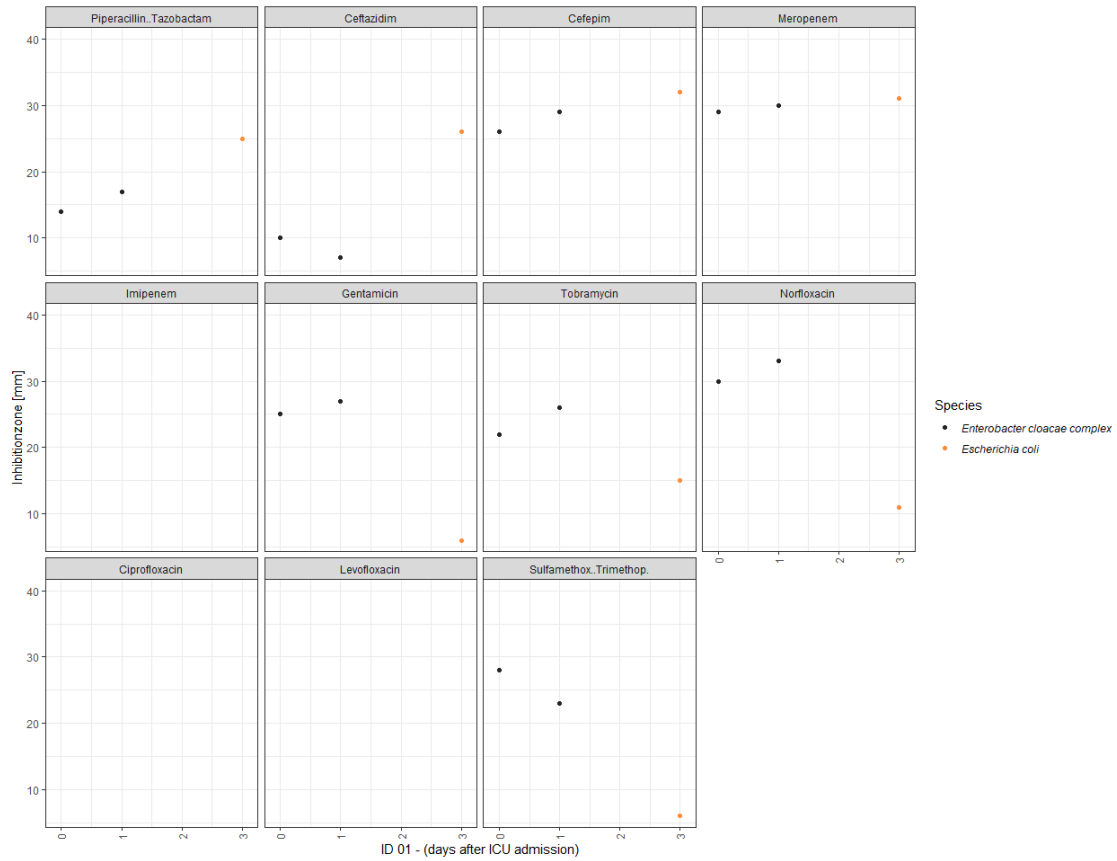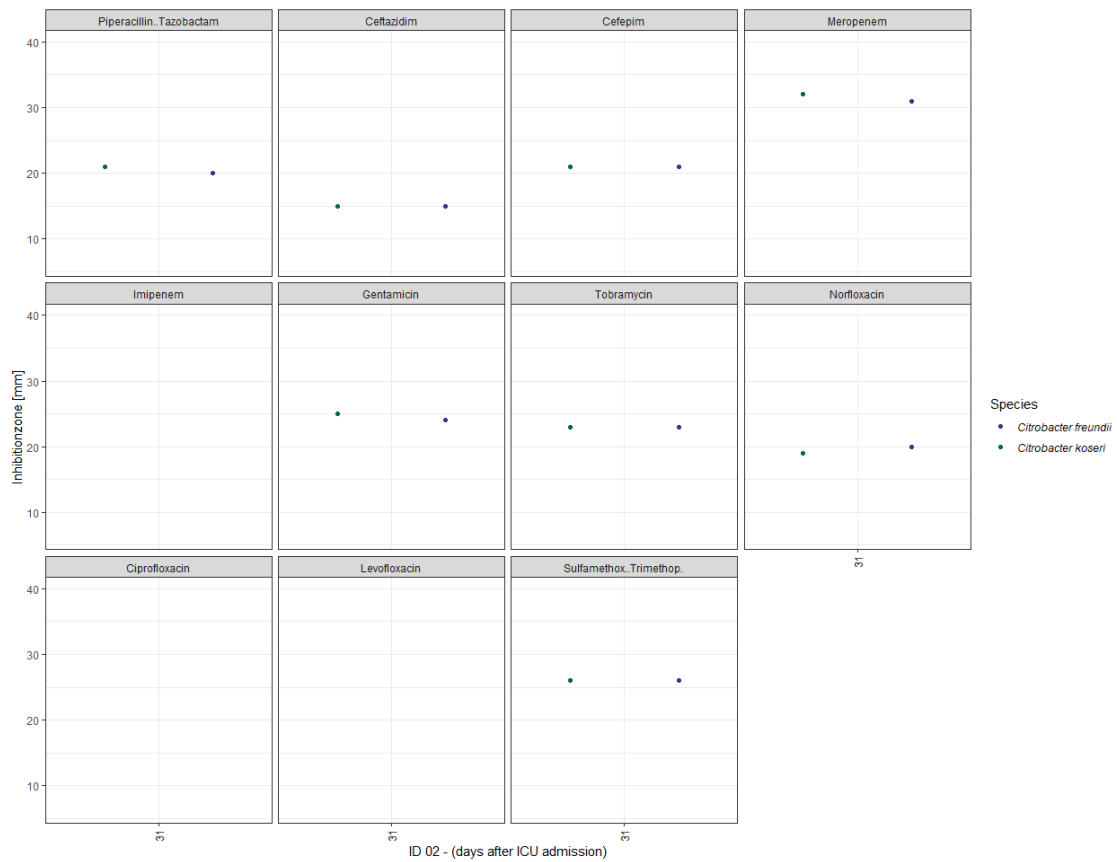

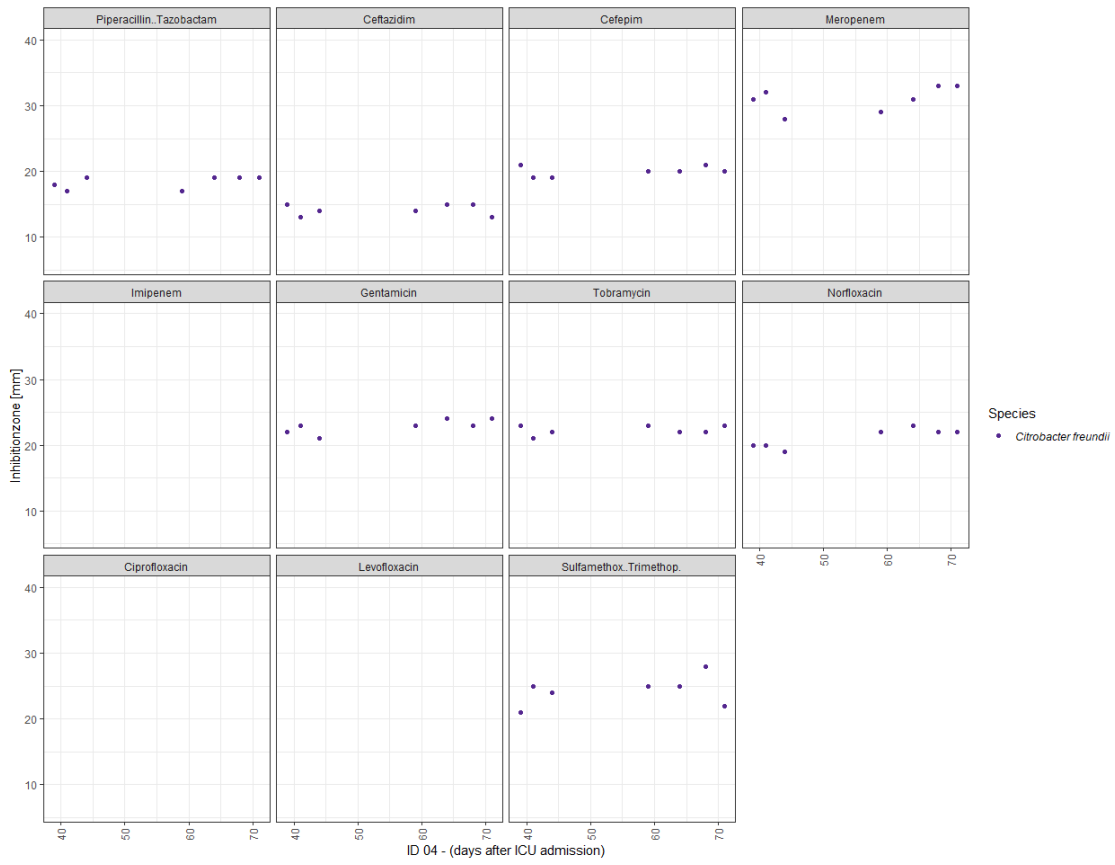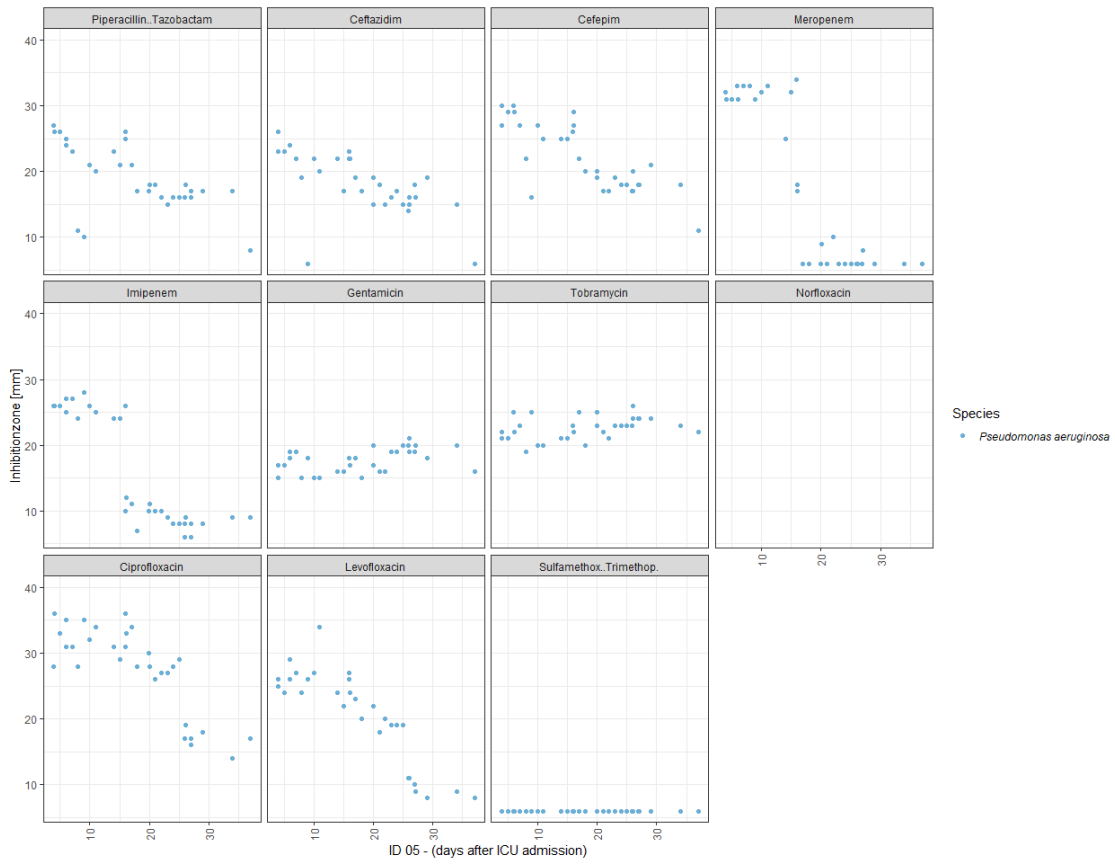

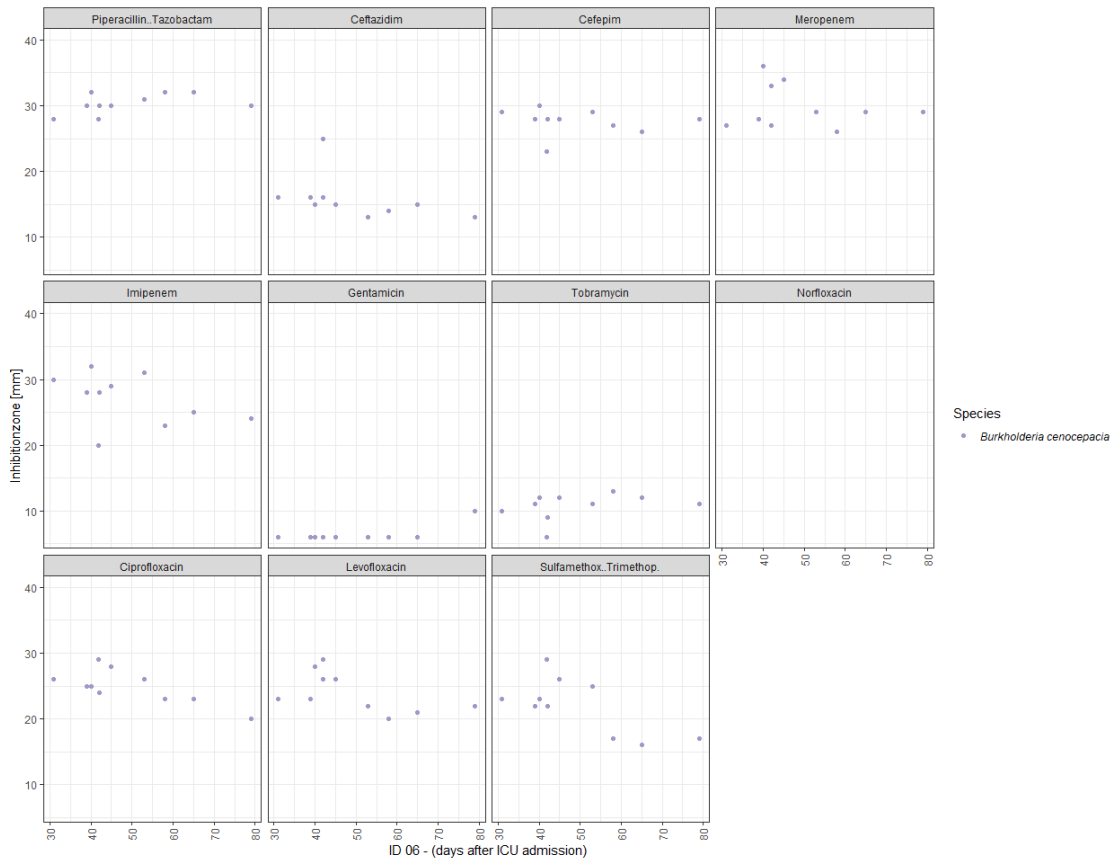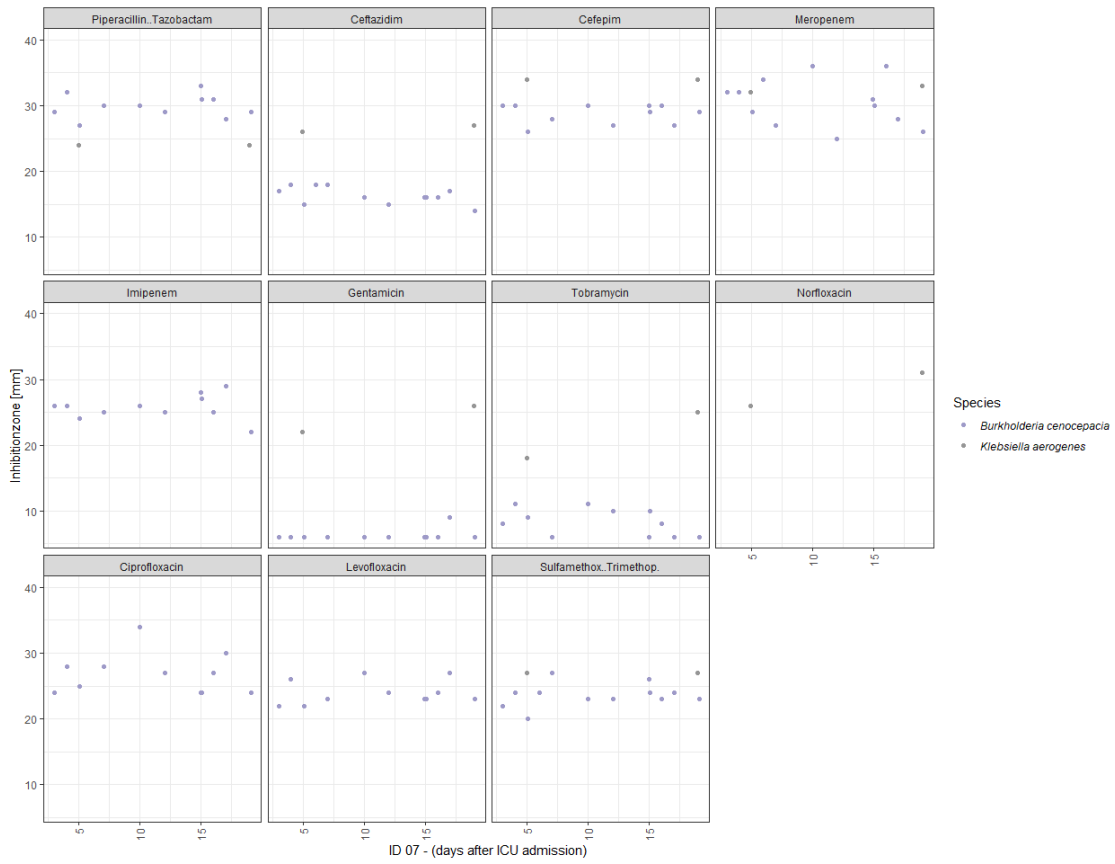

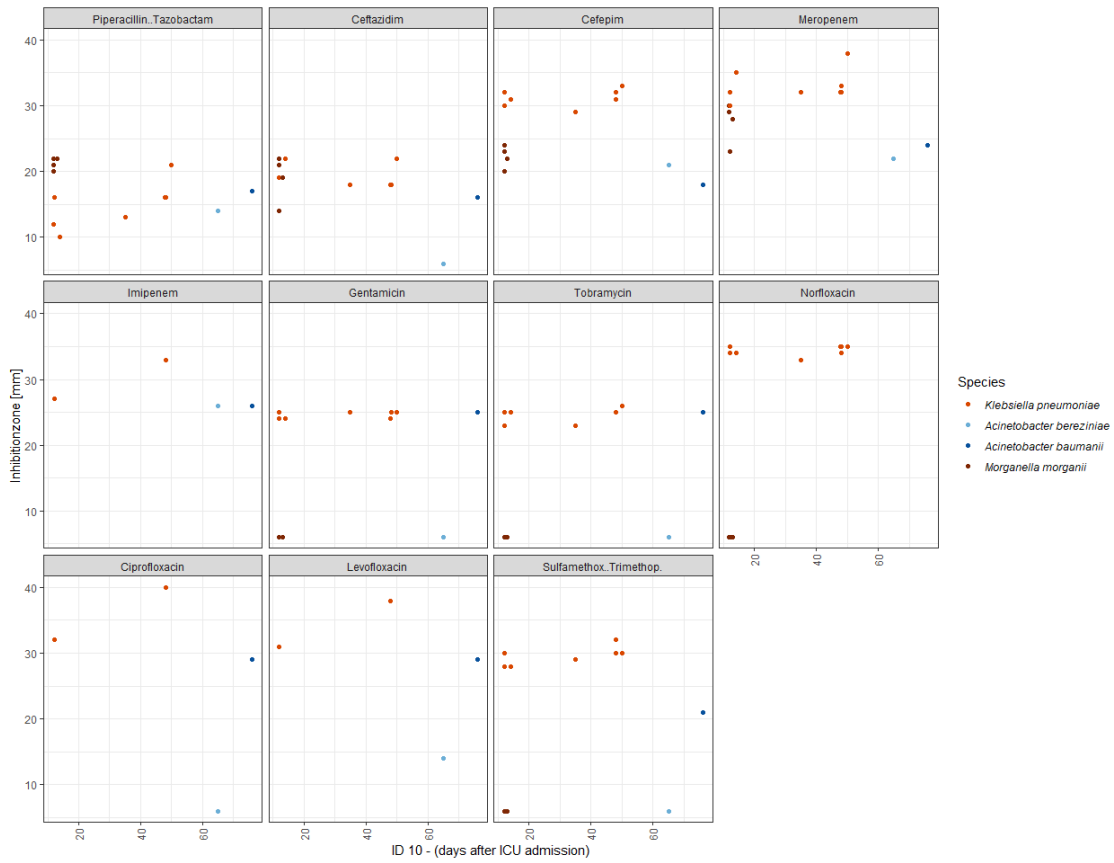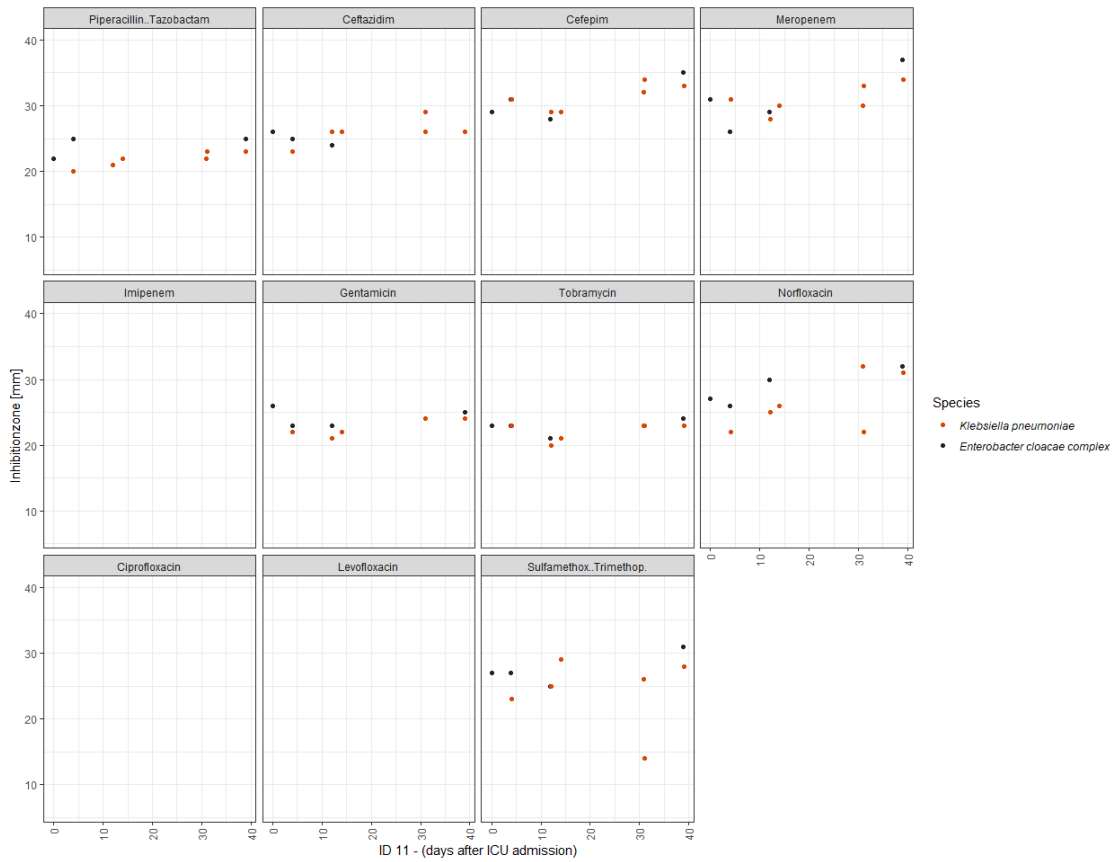

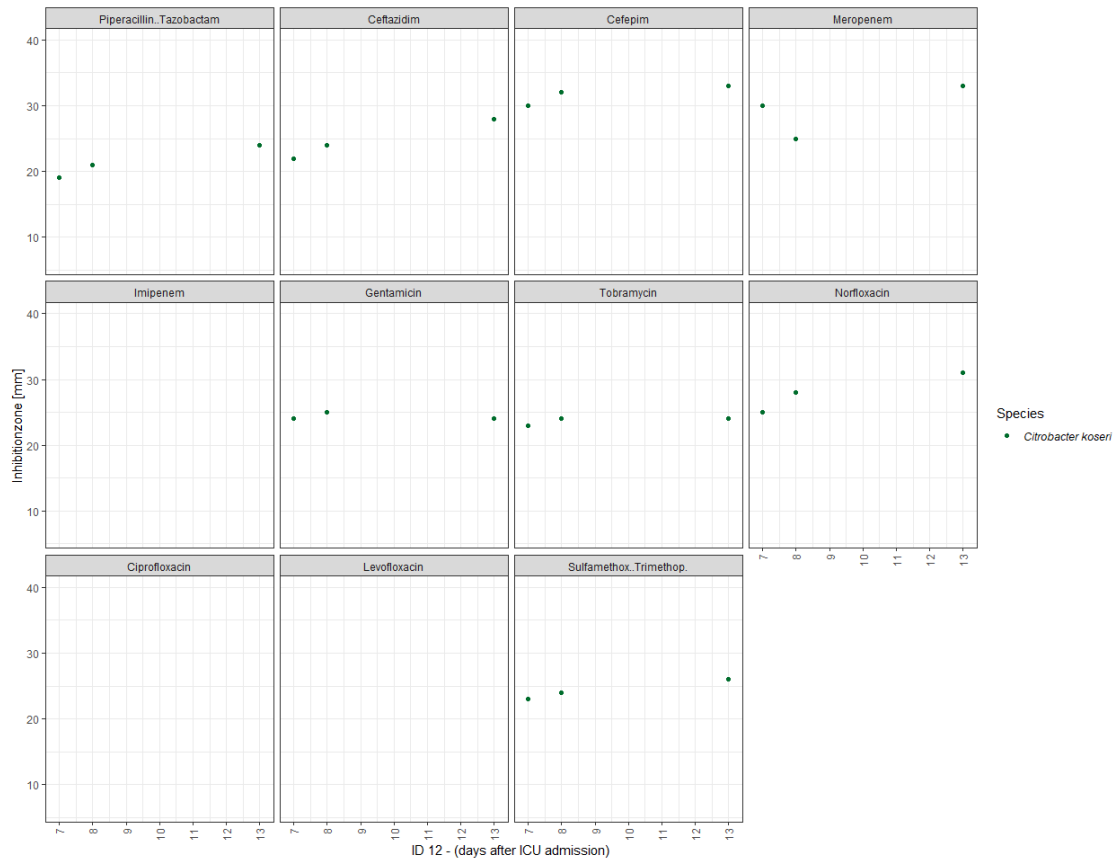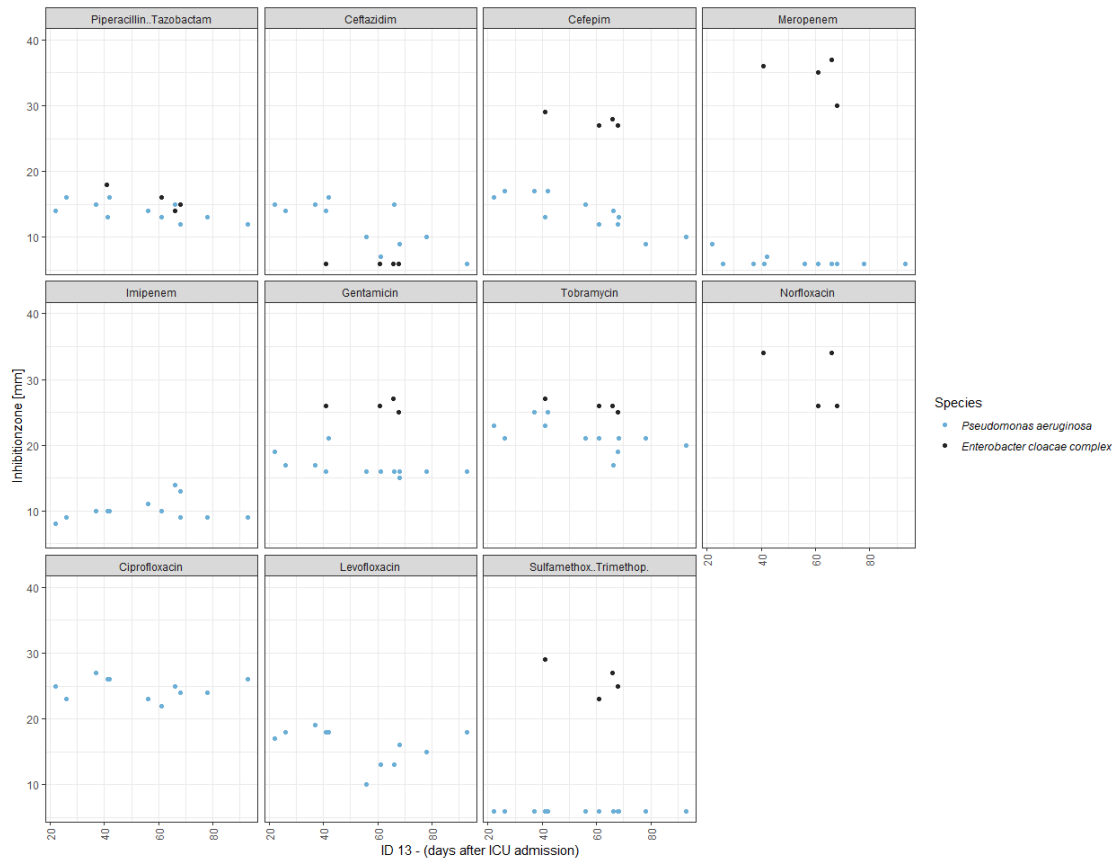



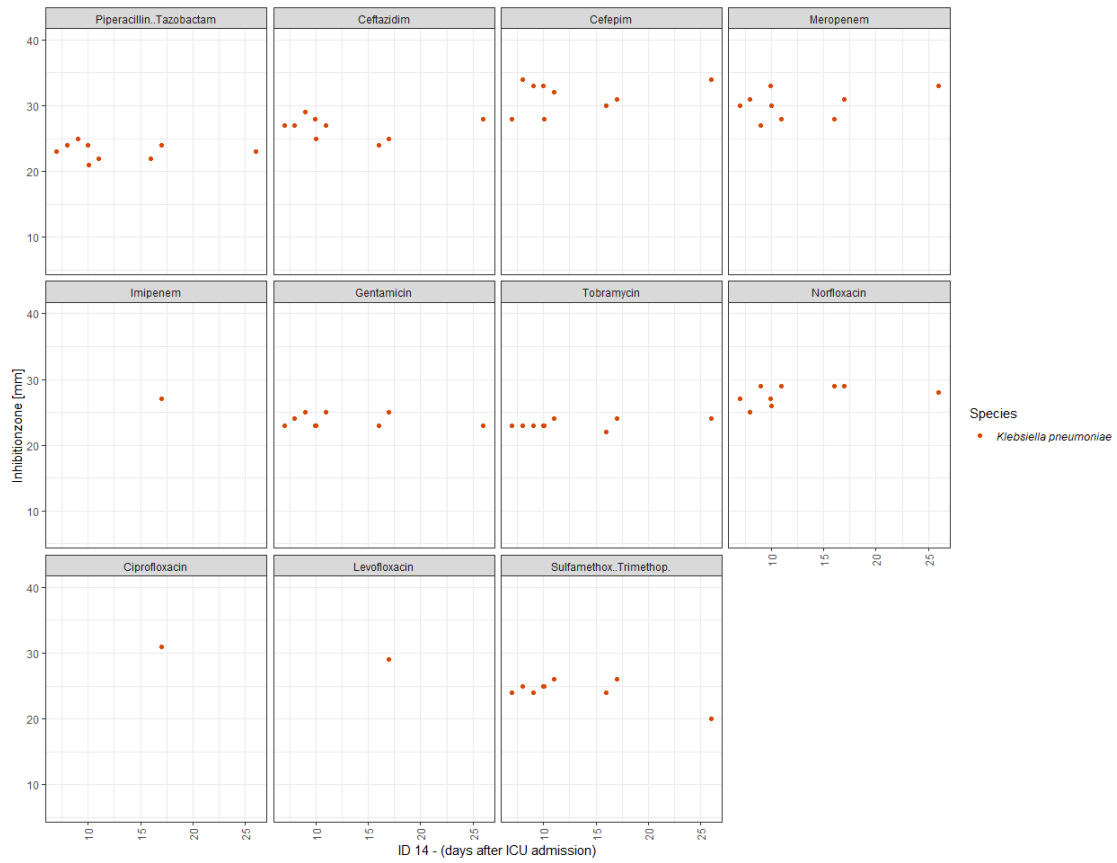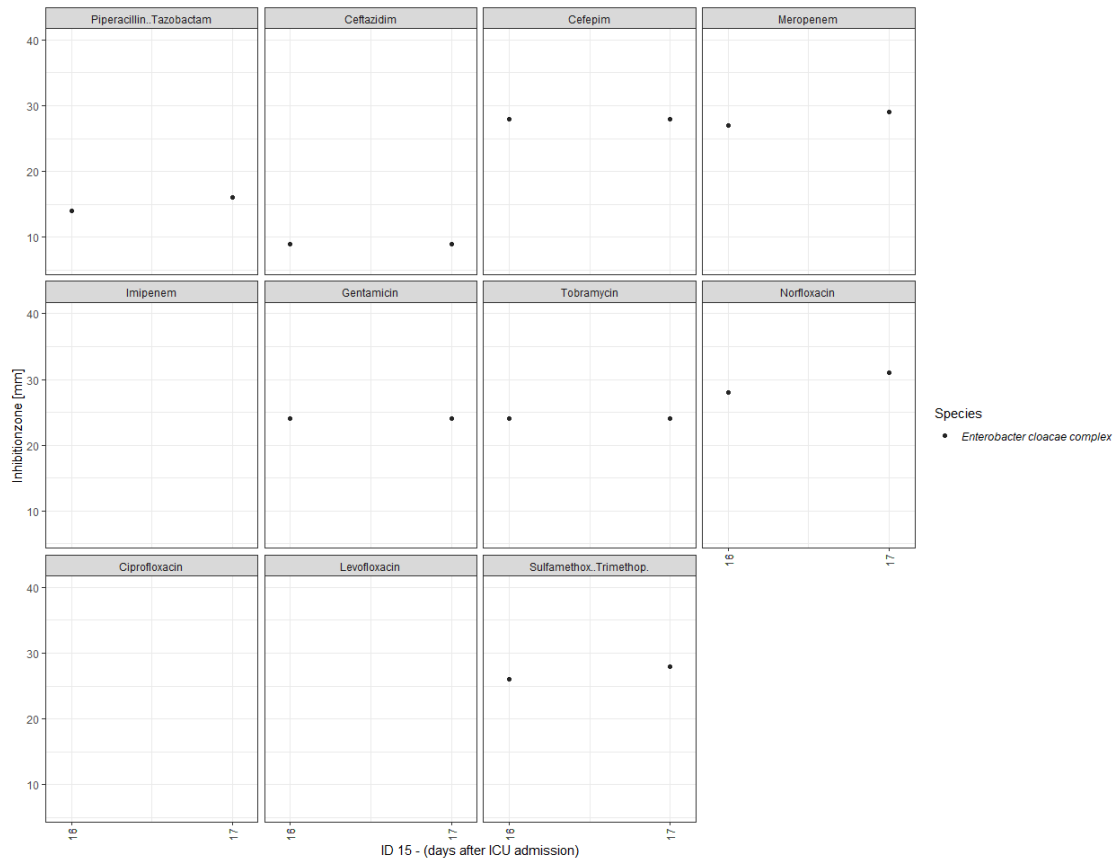

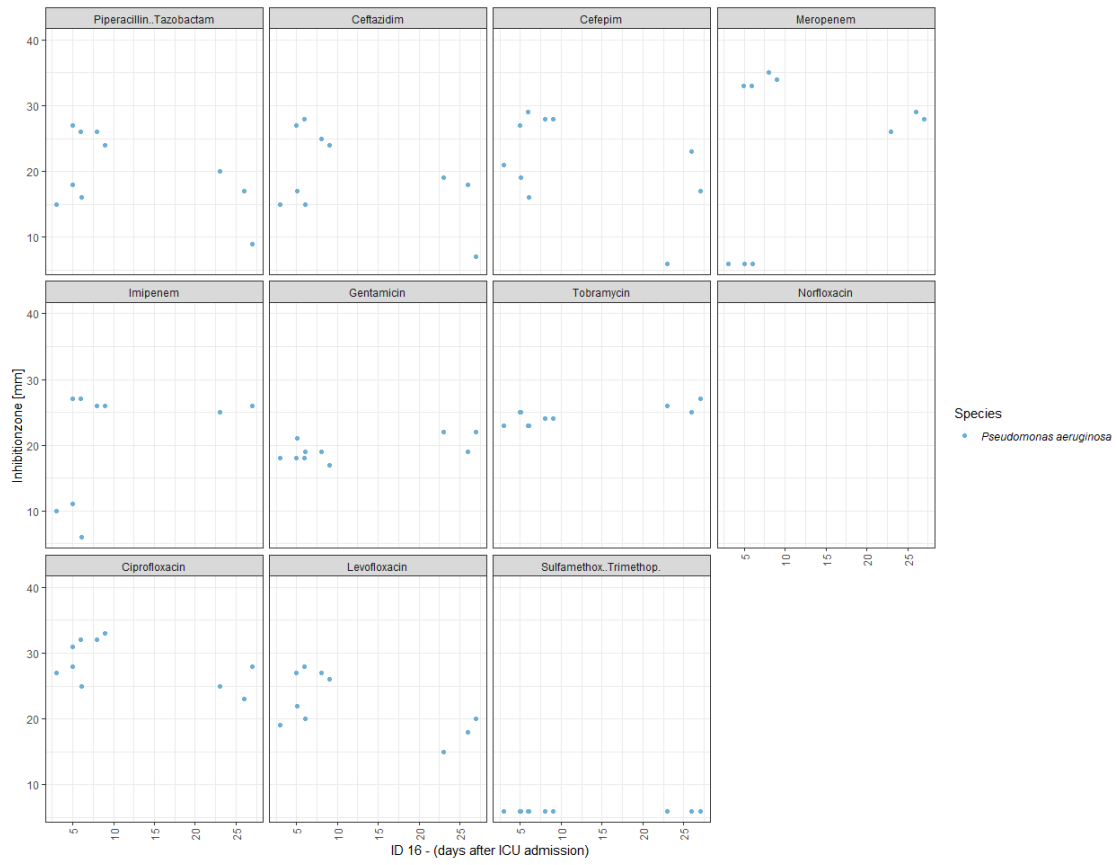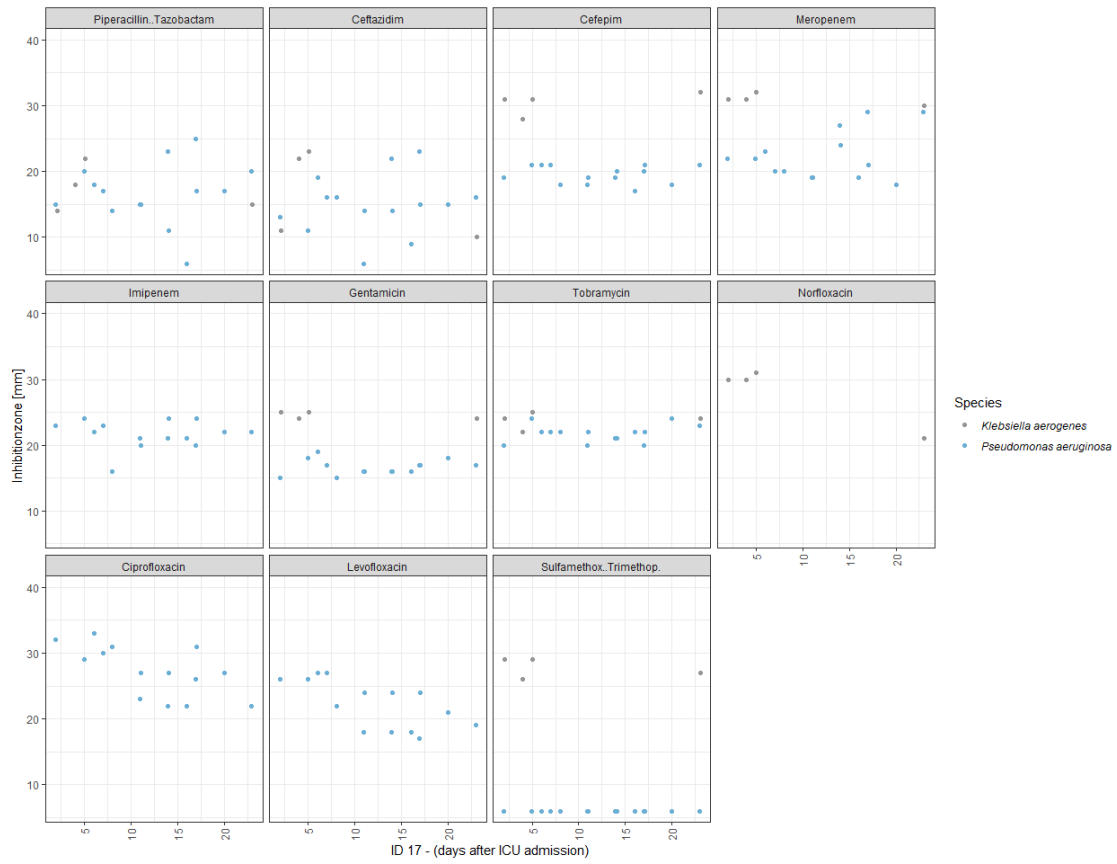

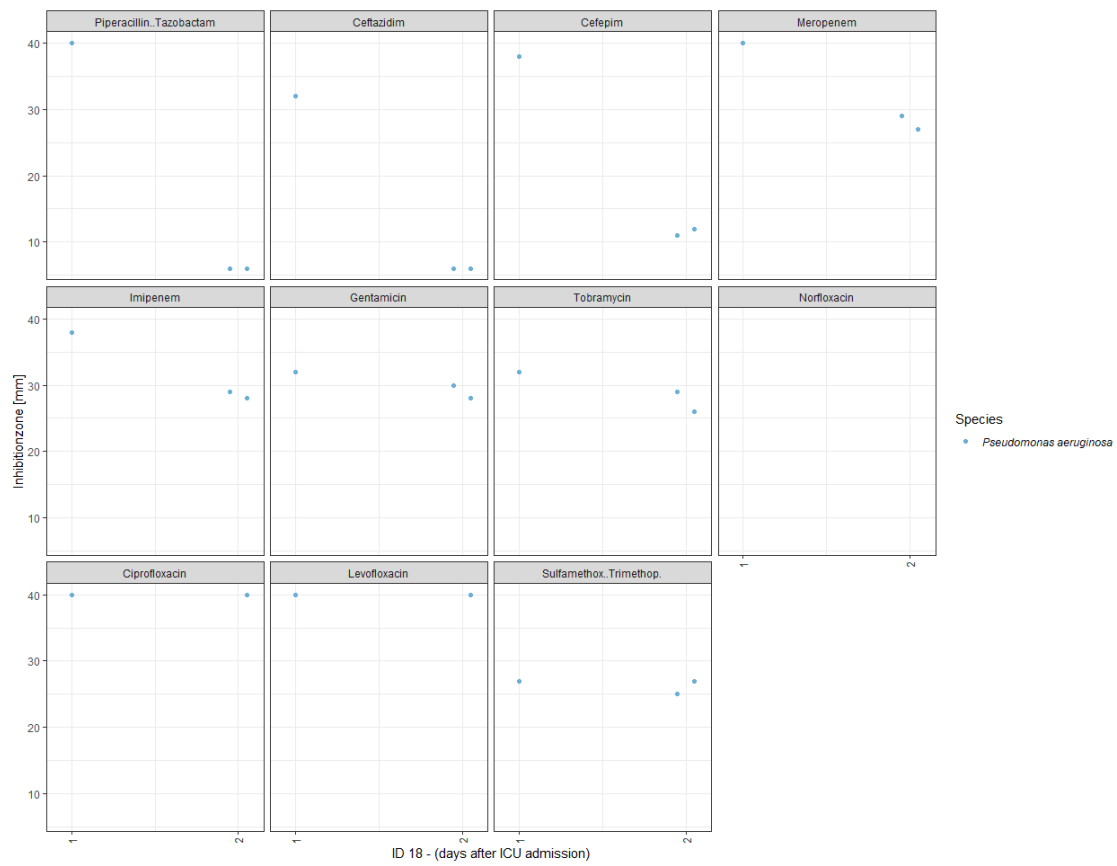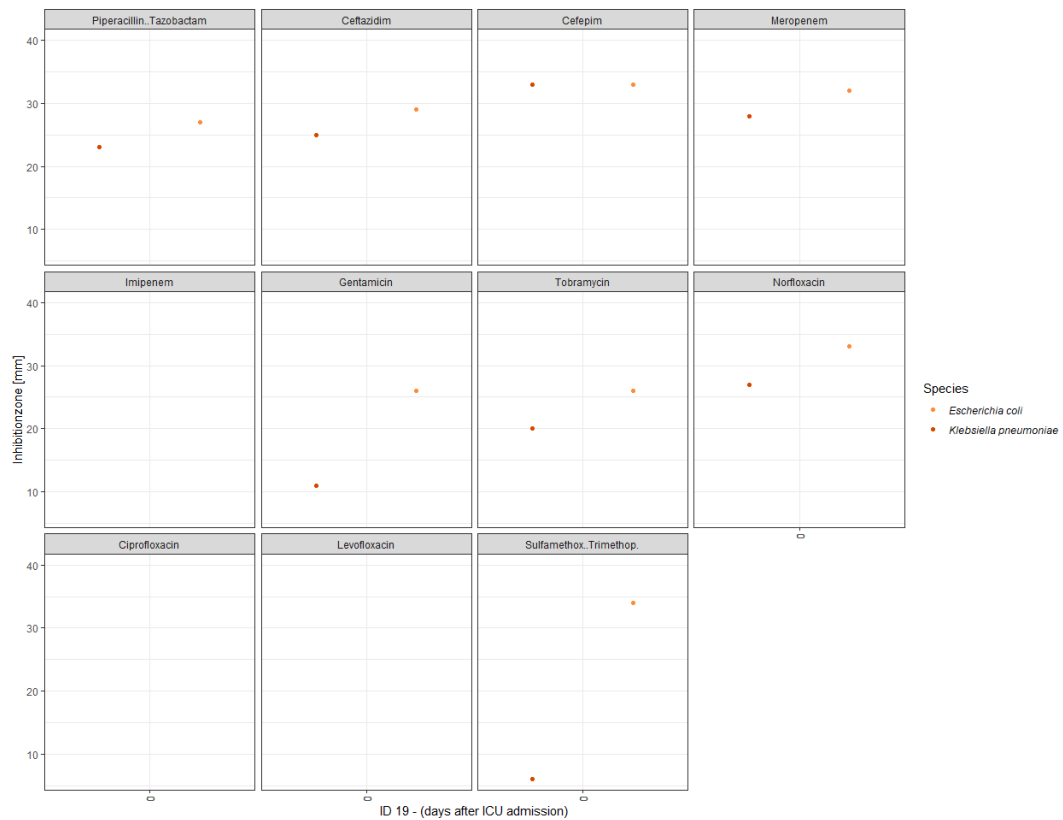

**Figure S4. EUCAST disc diffusion inhibition zones of repetitive microbiotaCOVID cohort isolates. ID numbers refer to patient IDs ( $n = 16$ , only patients with repetitive isolates are shown).**

**Table S1. Clinical characteristics of patients in this study (n = 17).**

---

|                                                                       | <b>n = 17</b>    |
|-----------------------------------------------------------------------|------------------|
| <b>Baseline characteristics</b>                                       |                  |
| Age                                                                   | 65 (56-59)       |
| Male sex                                                              | 14 (82%)         |
| Body mass index (kg/m <sup>2</sup> )                                  | 27.8 (27.2-34.2) |
| <b>Clinical data at ICU admission</b>                                 |                  |
| Sepsis-related organ failure assessment score (SOFA)                  | 9 (7-10)         |
| Simplified acute physiology score (SAPS) II                           | 42 (28-51)       |
| <b>Outcomes</b>                                                       |                  |
| Time of pulmonary superinfection detection after ICU admission (days) | 7 (3-16)         |
| Duration of ventilation (days)                                        | 37 (18-43)       |
| Length of ICU stay (days)                                             | 40 (24-51)       |
| Patients died                                                         | 4 (24%)          |
| <b>Antimicrobial therapy</b>                                          |                  |
| Empiric antimicrobial therapy at ICU admission                        | 16 (94%)         |
| Beta-lactam/beta-lactamase inhibitors (at any time)                   | 14 (82%)         |
| Cephalosporins (at any time)                                          | 15 (88%)         |
| Carbapenems (at any time)                                             | 12 (71%)         |
| Aminoglycosides (at any time)                                         | 8 (47%)          |
| Quinolones (at any time)                                              | 10 (59%)         |

---

The data is presented as median (interquartile range (IQR)) or number and percentage (%).

**Table S2. Disc diffusion proportion of drug resistant and intermediate isolates.**

|     | <i>Enterobacterales</i> n = 25 |                                   | <i>P. aeruginosa</i> n = 32    |                                   |
|-----|--------------------------------|-----------------------------------|--------------------------------|-----------------------------------|
|     | Disc diffusion % resistant (n) | Disc diffusion % intermediate (n) | Disc diffusion % resistant (n) | Disc diffusion % intermediate (n) |
| FEP | 8.0% (2)                       | 4.0% (1)                          | 56.3% (18)                     | 43.8% (14) (r./i.)                |
| TZP | 32.0% (8)                      | 12.0% (3)                         | 65.6% (21)                     | 34.4% (11) (r./i.)                |
| SXT | 4.0% (1)                       | 0.0% (0)                          | No break point                 | No break point                    |
| MEM | 0.0% (0)                       | 0.0% (0)                          | 50.0% (16)                     | 15.6% (5)                         |
| AMI | 0.0% (0)                       | (n. ir.)                          | 0.0%                           | (n. ir.)                          |
| TOB | 4.0% (1)                       | (n. ir.)                          | 0.0%                           | (n. ir.)                          |
| GEN | 4.0% (1)                       | (n. ir.)                          | 0.0%                           | (n. ir.)                          |
| PLZ | No DD results                  | No DD results                     | No DD results                  | No DD results                     |
| APR | No DD results                  | No DD results                     | No DD results                  | No DD results                     |
| AMC | 72.0% (18)                     | 0.0% (0)                          | No DD results                  | No DD results                     |
| CRO | 32.0% (8)                      | 0.0% (0)                          | No DD results                  | No DD results                     |
| CAZ | 36.0% (9)                      | 0.0% (0)                          | 46.9% (15)                     | 53.1% (17)                        |
| CIP | No DD results                  | No DD results                     | 15.6% (5)                      | 84.4% (27) (r./i.)                |

n.ir.: no intermediate disc diffusion range

r./i.: only resistant and intermediate disc diffusion range

cefepime (FEP), piperacillin/tazobactam (TZP), trimethoprim/sulfamethoxazole (SXT), meropenem (MEM), amikacin (AMI), tobramycin (TOB), gentamicin (GEN), plazomicin (PLZ), apramycin (APR), amoxicillin/clavulanate (AMC), ceftriaxone (CRO), ceftazidime (CAZ), ciprofloxacin (CIP)

**Table S3. MIC proportion of drug resistant and intermediate isolates.**

|     | <i>Enterobacterales</i> n = 25 |                           | <i>P. aeruginosa</i> n = 32 |                           |
|-----|--------------------------------|---------------------------|-----------------------------|---------------------------|
|     | MIC %<br>resistant (n)         | MIC %<br>intermediate (n) | MIC %<br>resistant (n)      | MIC %<br>intermediate (n) |
| FEP | 8.0% (2)                       | 0.0%                      | 65.6% (21)                  | 34.4% (11) (r./i.)        |
| TZP | 30.0% (7.5)                    | 6.0% (1.5)                | 45.3% (14.5)                | 54.7% (17.5) (r./i.)      |
| SXT | 4.0% (1)                       | 0.0% (0)                  | No break point              | No break point            |
| MEM | 0.0% (0)                       | 0.0% (0)                  | 50.0% (16)                  | 0.0% (0)                  |
| AMI | 0.0% (0)                       | (n. ir.)                  | 0.0% (0)                    | (n. ir.)                  |
| TOB | 4.0% (1)                       | (n. ir.)                  | 0.0% (0)                    | (n. ir.)                  |
| GEN | 4.0% (1)                       | (n. ir.)                  | 0.0% (0)                    | (n. ir.)                  |
| PLZ | 0.0% (0)                       | 0.0% (0)                  | No break point              | No break point            |
| APR | 0.0% (0)                       | (n. ir.)                  | 0.0% (0)                    | (n. ir.)                  |

n.ir.: no intermediate MIC range

r./i.: only resistant and intermediate MIC range

cefepime (FEP), piperacillin/tazobactam (TZP), trimethoprim/sulfamethoxazole (SXT), meropenem (MEM), amikacin (AMI), tobramycin (TOB), gentamicin (GEN), plazomicin (PLZ), apramycin (APR)

**Table S4. MIC proportion of drug resistant and intermediate isolates.**

|     | <i>B. cenocepacia</i> n = 12      |                                      |                        |                           |
|-----|-----------------------------------|--------------------------------------|------------------------|---------------------------|
|     | Disc diffusion %<br>resistant (n) | Disc diffusion %<br>intermediate (n) | MIC %<br>resistant (n) | MIC %<br>intermediate (n) |
| SXT | 0% (0)                            | 0% (0)                               | 0% (0)                 | (n.ir.)                   |
| MEM | 0% (0)                            | 0% (0)                               | 8.3% (1)               | 25% (3)                   |

n.ir.: no intermediate MIC range

trimethoprim/sulfamethoxazole (SXT), meropenem (MEM)
